# Supplementary material for: Osmotic-engine-driven liposomes in microfluidic channels
Source: Royal Society of Chemistry journal article supplement (doi:10.1039/c9lc00788a), 2019-01-01
Supplement: c9lc00788a5.pdf [file c9lc00788a5.pdf]

## Supporting Information

### Osmotic-Engine-Driven Liposomes in Microchannels

Kan Shoji<sup>\*a,b</sup>, and Ryuji Kawano<sup>\*a</sup>

<sup>a</sup>. Department of Biotechnology and Life Science, Tokyo University of Agriculture and Technology

<sup>b</sup>. Department of Chemistry, University of Cincinnati

\* Corresponding authors

E-mail:

kan-shoji@m2.tuat.ac.jp (K. Shoji)

rjkawano@cc.tuat.ac.jp (R. Kawano)

Contents:

S.1. Liposome formation by a water-in-oil emulsion centrifugation method

Fig. S1 Microscopic images of lipid membrane (DOPC:Chol) deformation with a salt concentration difference (1 M : 0.1 M KCl) at each droplet.

Fig. S2 Result of hydrodynamic simulation of the salt concentration when a liposome was not trapped in the narrow channel.

Fig. S3 Trapping duration of liposomes in the microchannel.

Fig. S4 Results of bead tracking with and without a salt concentration difference.

Fig. S5 Relationship between the liposome size and channel dimensions for capturing liposomes.

Movie 1 Deformation of the pBLM induced by the osmotic pressure difference

Movie 2 Liposome trapped by the microchannel

Movie 3 Movement of a liposome induced by the osmotic pressure difference

Movie 4 Tracking of microbeads tracking in a liposome

### S.1. Liposome formation by a water-in-oil emulsion centrifugation method

Aqueous buffered solutions (1.0 M KCl, 10 mM MOPS, pH 7.0) with and without 0.1 mg/mL calcein were prepared as inner and outer solutions, respectively. Then, 300  $\mu\text{L}$  of a lipid/oil mixture in which DOPC, DOPS, and chol were dissolved in liquid paraffin at a molar ratio of 9:1:3 was prepared. 300  $\mu\text{L}$  of the outer solution and 100  $\mu\text{L}$  of the lipid/oil mixture were layered in a microtube and incubated at 4  $^{\circ}\text{C}$  for 60 min. 10  $\mu\text{L}$  of the inner solution was added to 200  $\mu\text{L}$  of the lipid/oil mixture and mixed by vortex for 30 s to prepare W/O emulsions. The emulsions were added to the layered solution and centrifuged at 18,800 g for 15 min. The precipitated liposomes were collected with a micropipette. When the microbeads-encapsulated liposomes were prepared, Rhod PE was dissolved in the lipid/oil mixture at a molar ratio of 1000:1 (DOPC:Rhod PE).

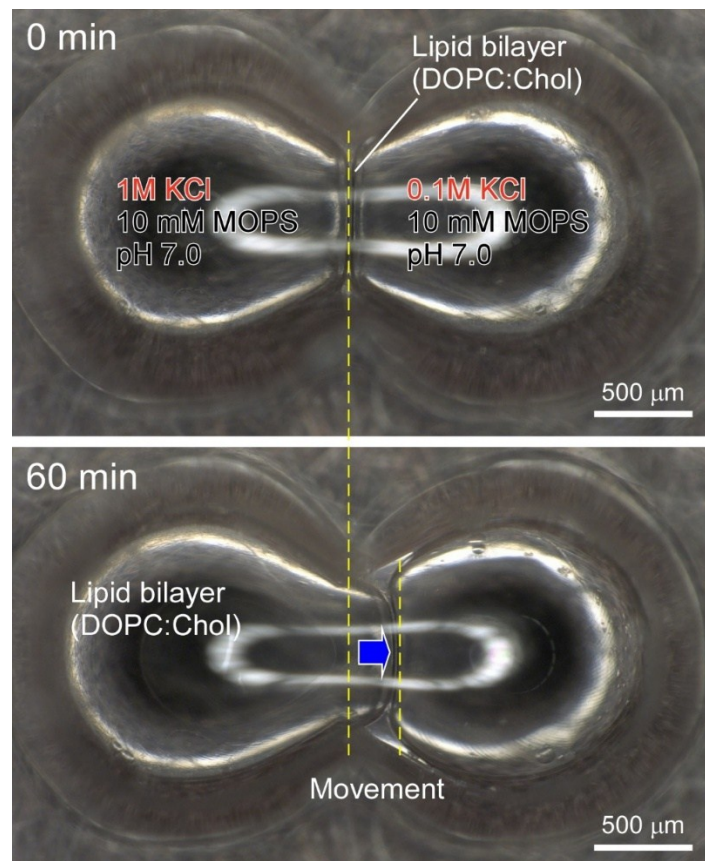

Fig. S1 Microscopic images of lipid membrane (DOPC:Chol) deformation with a salt concentration difference (1 M : 0.1 M KCl) at each droplet.

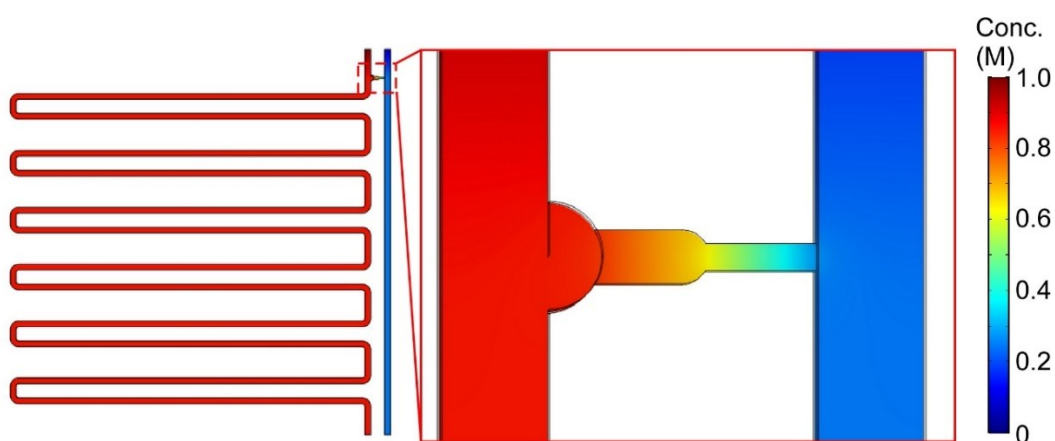

Fig. S2 Result of hydrodynamic simulation of the salt concentration when a liposome was not trapped in the narrow channel.

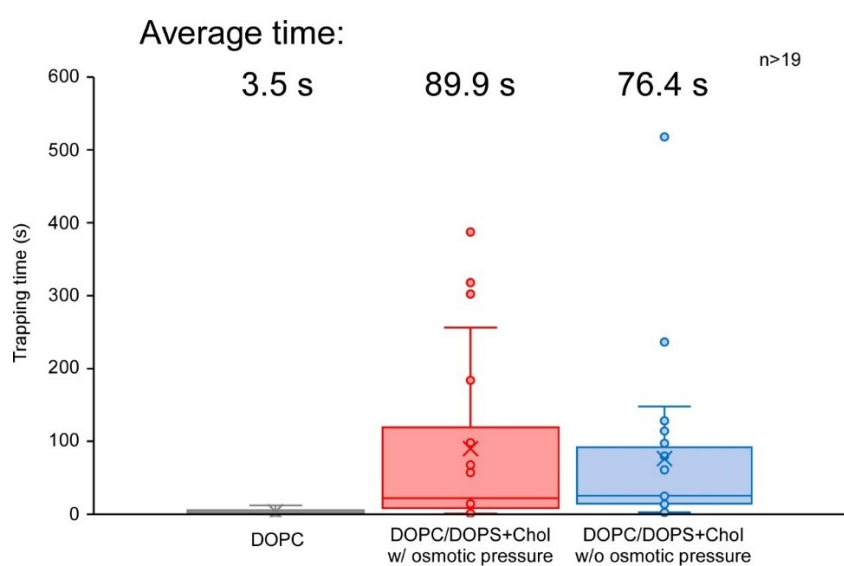

Fig. S3 Comparison of trapping durations of liposomes formed by DOPC and DOPC/DOPS+ cholesterol. The trapping duration of the liposome increased by changing the lipid composition of liposomes from “DOPC” to “DOPC/DOPS+ cholesterol”. In addition, there is no significant differences between with and without osmotic pressure differences.

W/o salt concentration difference

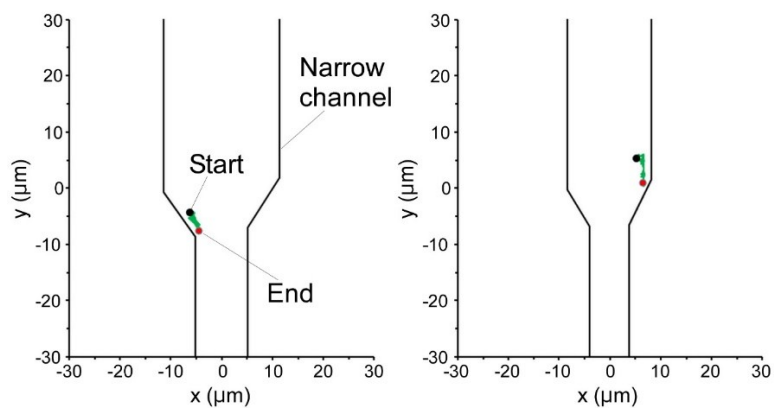

W/ salt concentration difference

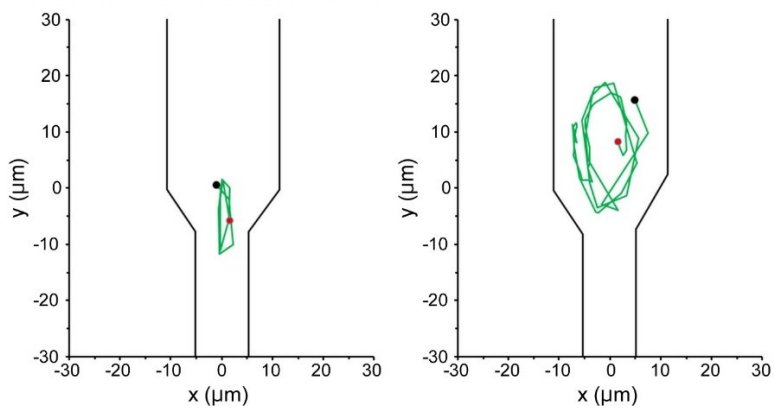

Fig. S4 Results of bead tracking with and without a salt concentration difference.

Liposome size

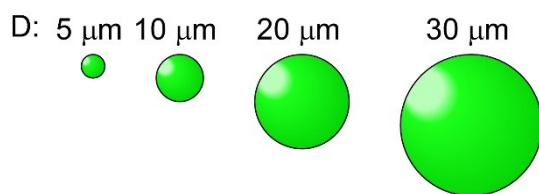

Channel dimensions

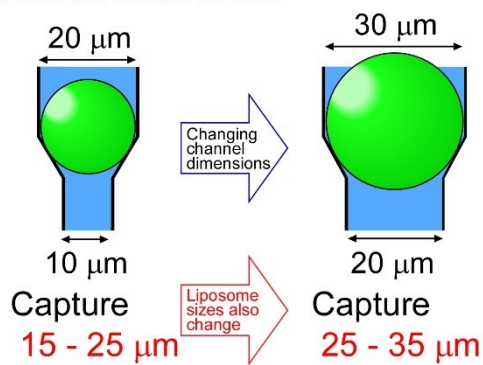

Fig. S5 Relationship between the liposome size and channel dimensions for capturing liposomes.
